# Supplementary material
Source: PubMed Central journal article supplement (PMC6646211)
Supplement: ao8b01478_si_001.pdf [file ao8b01478_si_001.pdf]

## Supporting Information

### **An improved admixture vaccine of fentanyl and heroin hapten-immunoconjugates: antinociceptive evaluation of fentanyl-contaminated heroin**

Candy S. Hwang,<sup>†,§</sup> Lauren C. Smith,<sup>†,‡</sup> Yoshihiro Natori,<sup>†,||</sup> Beverly Ellis,<sup>†</sup> Bin Zhou,<sup>†</sup> and Kim D. Janda<sup>\*,†</sup>

<sup>†</sup>Departments of Chemistry, Immunology and Microbial Science, Skaggs Institute for Chemical Biology;  
<sup>‡</sup> Department of Neuroscience; The Scripps Research Institute, 10550 N Torrey Pines Rd, La Jolla, CA, 92037 USA

*KEYWORDS: antinociception, heroin, fentanyl, vaccine, hapten*

## Table of Contents

|                                                                              |    |
|------------------------------------------------------------------------------|----|
| Figure S1. MALDI-TOF MS spectrum of unconjugated BSA.....                    | S3 |
| Figure S2. MS-ESI(+) spectrum of unconjugated BSA .....                      | S4 |
| Figure S3. MALDI-TOF MS spectrum of Fent-BSA.....                            | S5 |
| Figure S4. MALDI-TOF MS spectrum of Her-BSA .....                            | S6 |
| Figure S5. Percent change in body weight over time .....                     | S7 |
| Figure S6. Average diameter of injection site reactions .....                | S7 |
| Figure S7. Heroin antinociception dose-response curves .....                 | S8 |
| Figure S8. Fentanyl antinociception dose-response curves .....               | S8 |
| Figure S9. 10% Fentanyl to heroin antinociception dose-response curves ..... | S9 |
| Figure S10. Serum titer response to TT by ELISA.....                         | S9 |

Figure S1. MALDI-TOF MS spectrum of unconjugated BSA

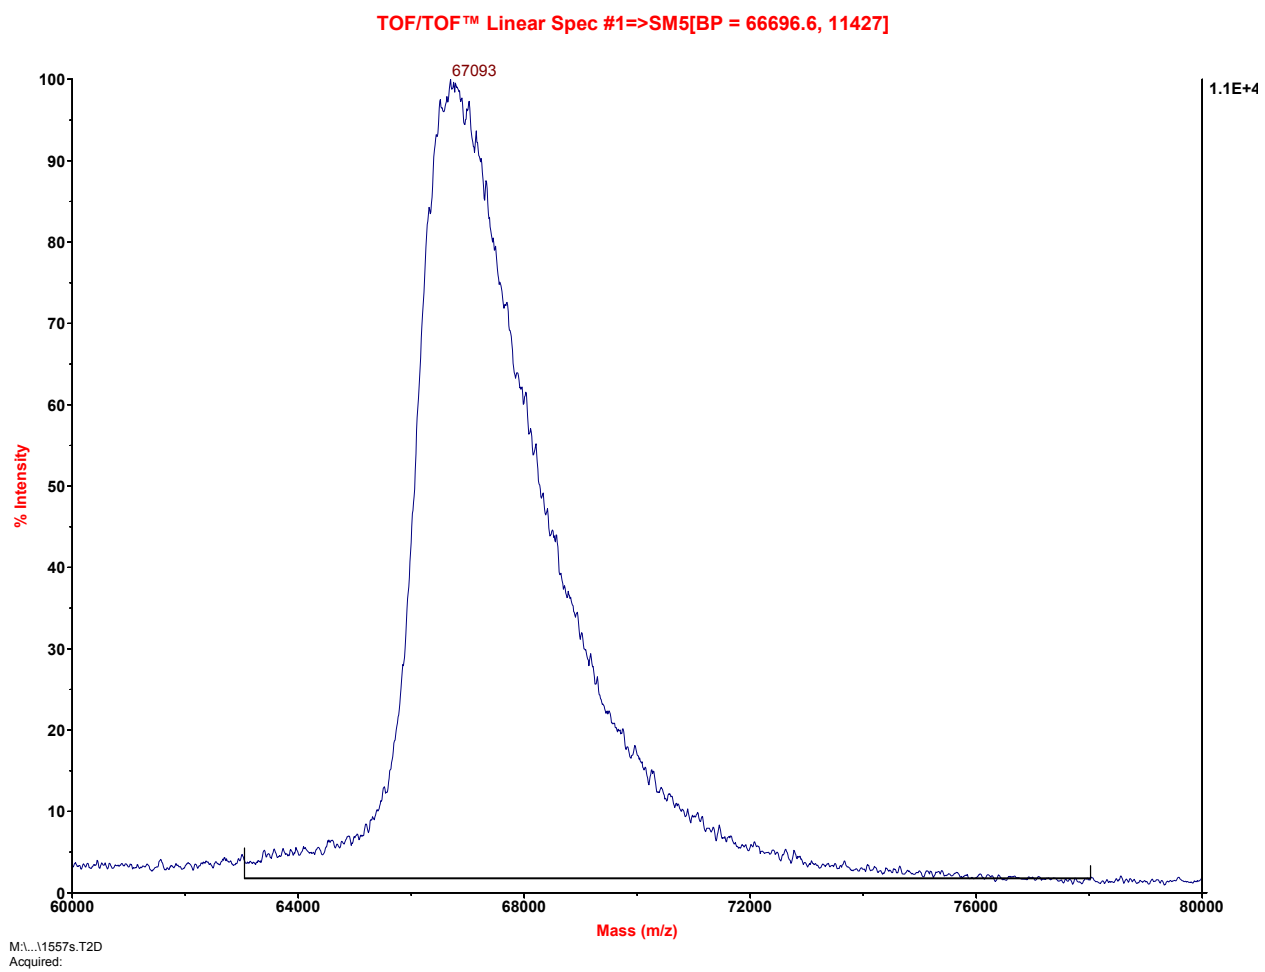

Figure S2. MS-ESI(+) spectrum of unconjugated BSA

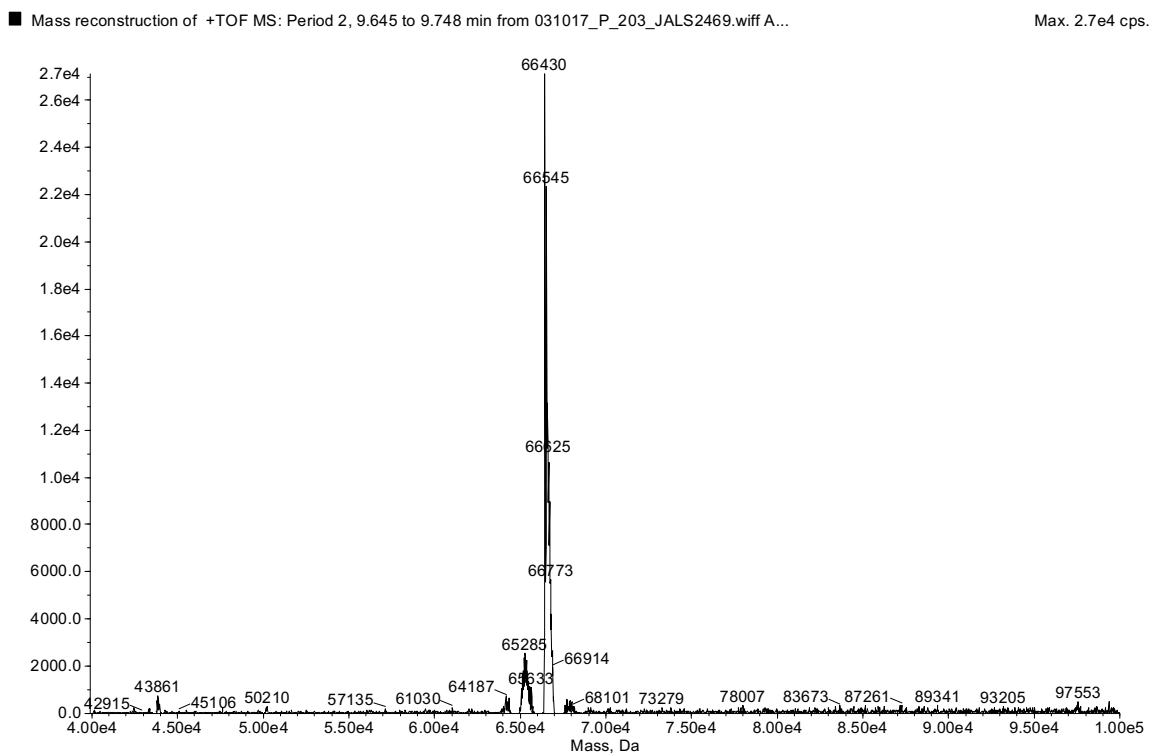

Figure S3. MALDI-TOF MS spectrum of Fent-BSA

Applied Biosystems MDS Analytical Technologies TOF/TOF™ Series Explorer™ 2003

TOF/TOF™ Linear Spec #1=>SM5[BP = 74915.0, 11205]

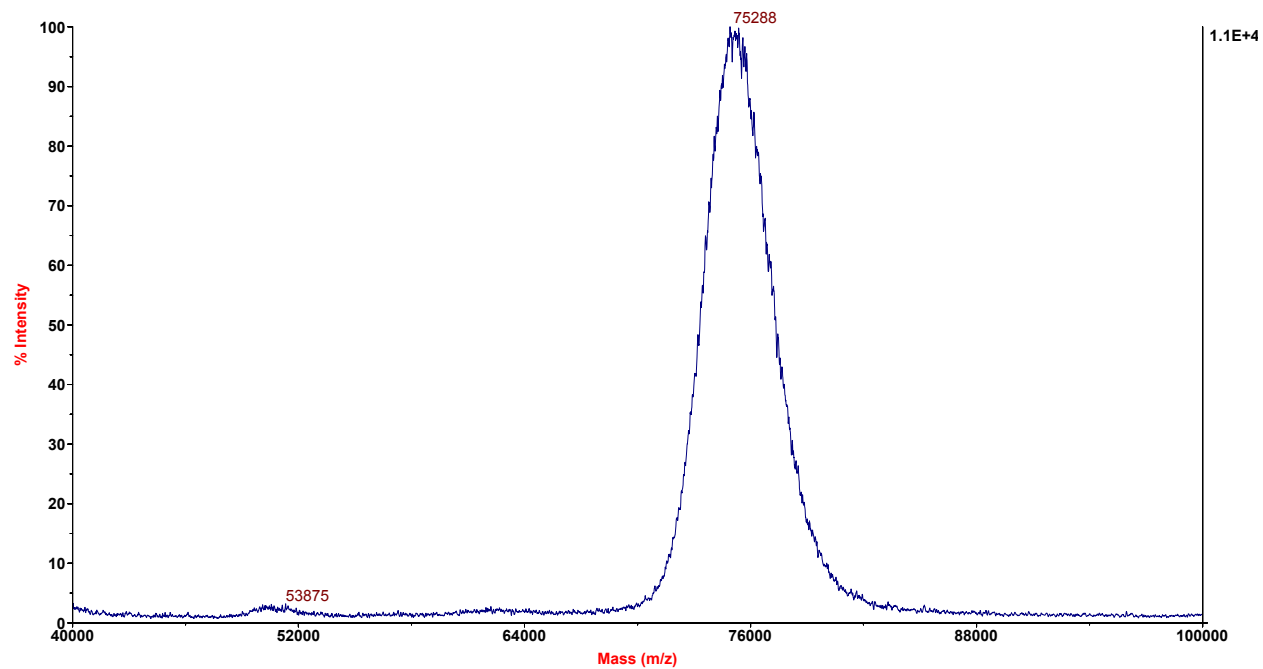

Figure S4. MALDI-TOF MS spectrum of Her-BSA

Applied Biosystems MDS Analytical Technologies TOF/TOF™ Series Explorer™ 2003

TOF/TOF™ Linear Spec #1=>SM5[BP = 72785.0, 11225]

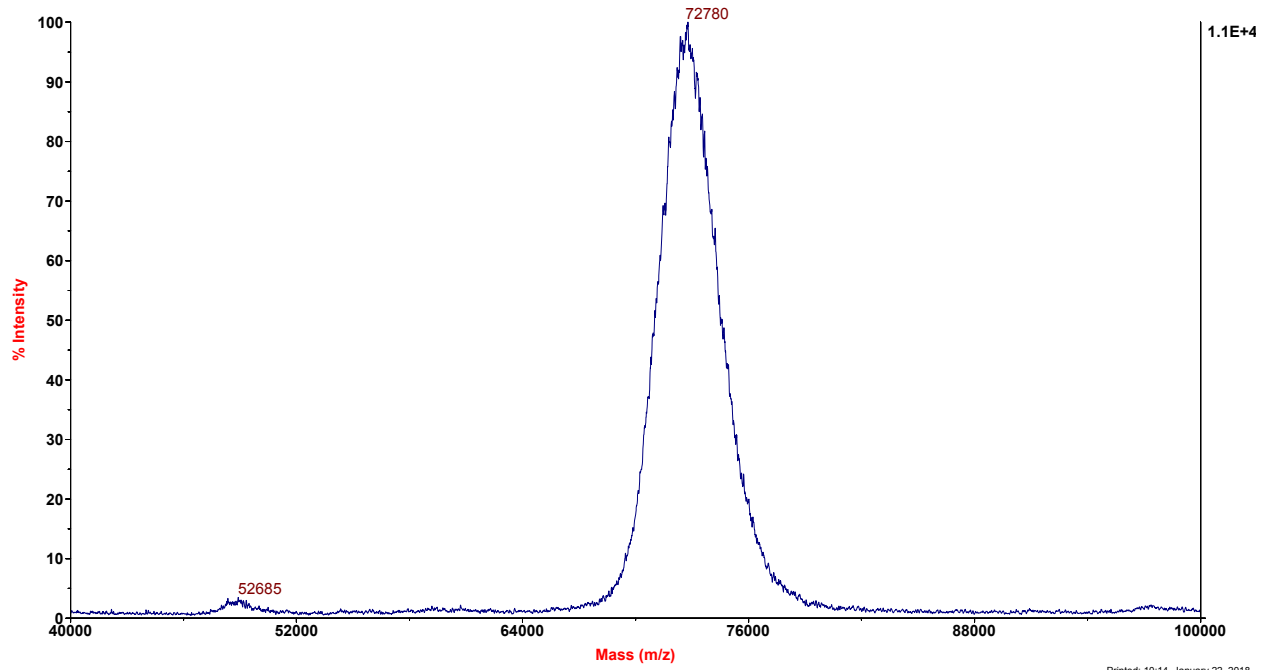

C:\DATA\routine\012218\JALSS649s.T2D

Printed: 10:14, January 22, 2018

Figure S5. Percent change in body weight over time  
Points represent means  $\pm$  SEM.

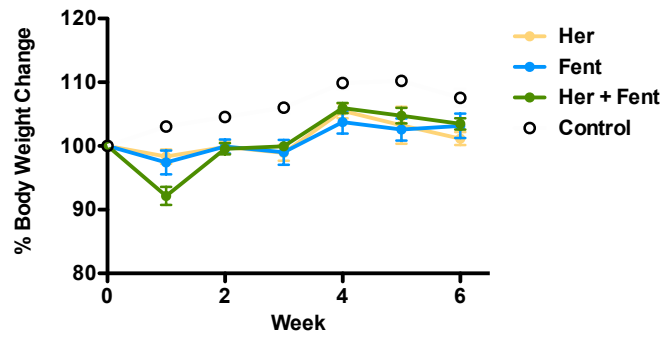

Figure S6. Average diameter of injection site reactions  
Horizontal lines represent means  $\pm$  SEM.

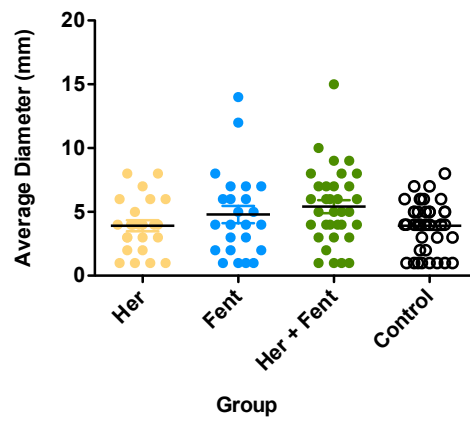

Figure S7. Heroin antinociception dose-response curves

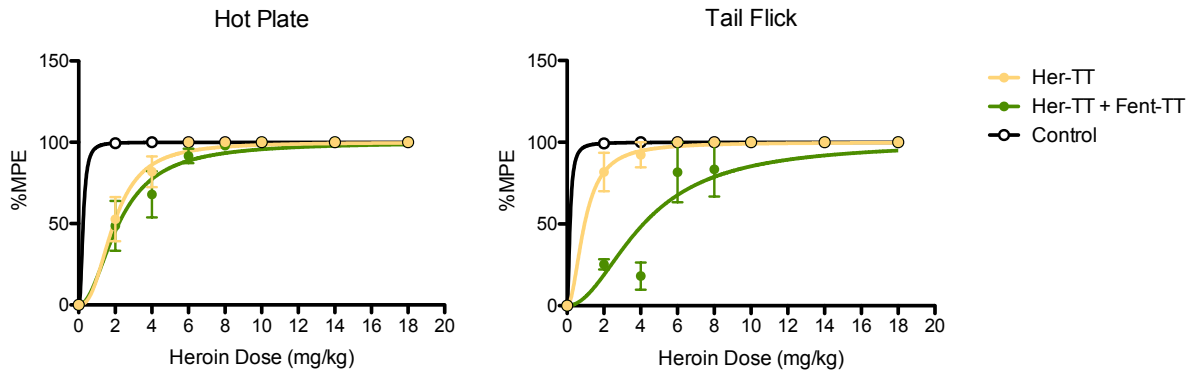

Figure S8. Fentanyl antinociception dose-response curves

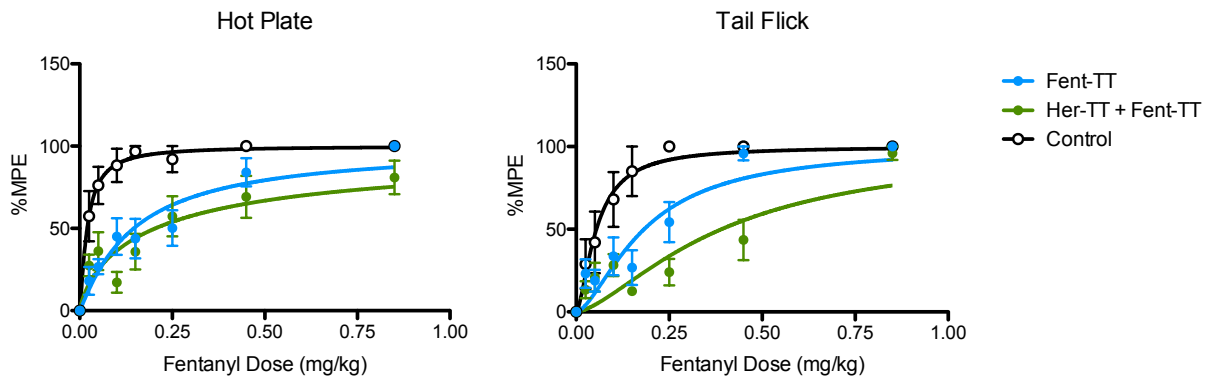



Figure S9. 10% Fentanyl to heroin antinociception dose-response curves

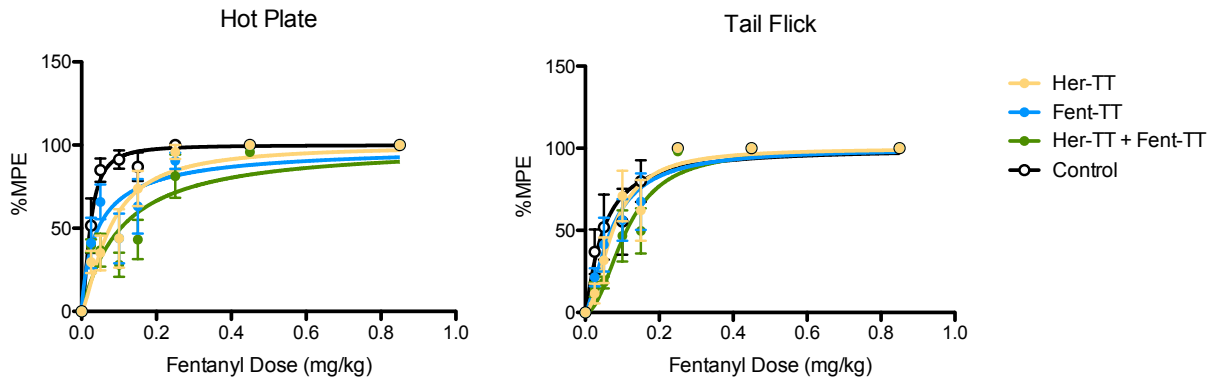

Figure S10. Serum titer response to TT by ELISA

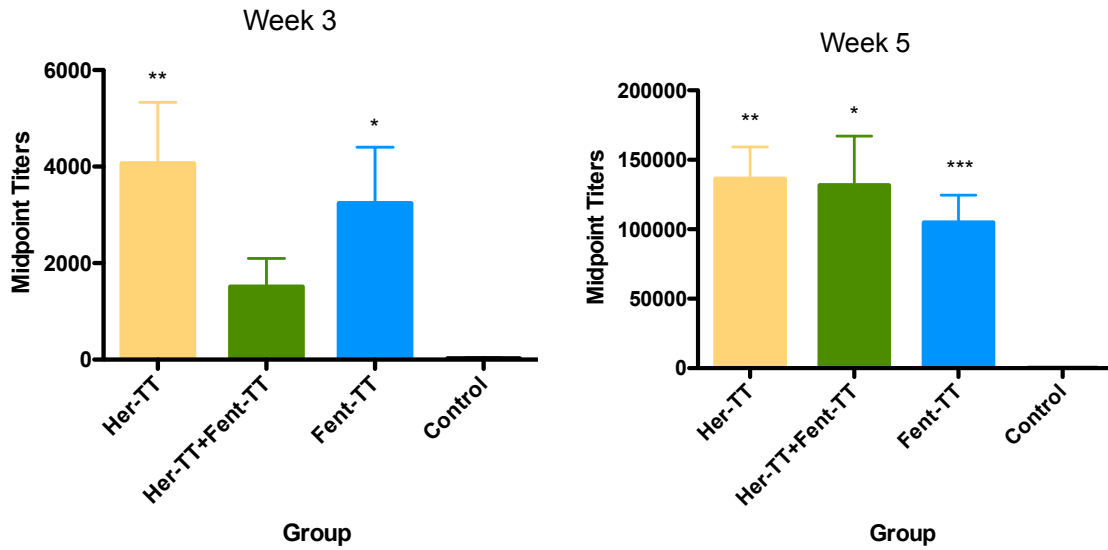

\* $P \leq 0.05$ ; \*\* $P \leq 0.01$ ; \*\*\* $P \leq 0.001$ ; significance versus control by Tukey multiple comparison test
